# Supplementary material
Source: HighWire-hosted journal article supplement (https://bmjopen.bmj.com/content/12/10/e064050)
Supplement: inline-supplementary-material-6 [file inline-supplementary-material-6.pdf]

## Online supplemental material 6 – Summary of nursing metrics reported across papers

| Nursing Metrics                         | Various definitions of individual metrics                                                                                                                                                                                                                           | Number of studies reporting a particular metric | Total number of studies reporting metrics |
|-----------------------------------------|---------------------------------------------------------------------------------------------------------------------------------------------------------------------------------------------------------------------------------------------------------------------|-------------------------------------------------|-------------------------------------------|
| nursing hour per patient day            | Total productive hours (care hours provided to patients) worked by registered nurses in a defined period/ Total number of patients admitted for care in the same defined period                                                                                     | 33                                              | 45                                        |
|                                         | Total number of all nursing hours provided to patients in a defined period (includes any combination of registered nursing hours, licensed practice nursing hours and nurse assistant hours)/ Total number of patients admitted for care in the same defined period | 11                                              |                                           |
|                                         | Average number of nursing hours provided by registered nursing and licensed practice nursing in a defined period/average number of patients admitted for care in the same defined period                                                                            | 1                                               |                                           |
| Patient to nurse ratio per shift        | Average reported number of patients by nurses on their last shift. Nurses' answers are averaged across a hospital to get a value.                                                                                                                                   | 32                                              | 32                                        |
| Bed to nurse ratio/ Nurse per bed ratio | Total number of beds divided by the total number of full-time equivalent registered                                                                                                                                                                                 | 2                                               | 10                                        |

|                                                |                                                                                                       |    |   |
|------------------------------------------------|-------------------------------------------------------------------------------------------------------|----|---|
|                                                | nurses (RNs) working in the general ward                                                              |    |   |
|                                                | Number of FTE nurses divided by the number of hospital beds                                           | 6  |   |
|                                                | Number of inpatient nurses per 100 occupied beds                                                      | 1  |   |
|                                                | Infection control nurse to bed ratio                                                                  | 1  |   |
| Nurse to patient ratio/ patient to nurse ratio | The ratio of nurse productive hours worked to "patient census days/24                                 | 1  | 7 |
|                                                | The ratio of total nurse staff to the total number of patients in a defined period                    | 2  |   |
|                                                | The measure of the number of patients assigned to each nurse who has a direct patient care assignment | 2  |   |
|                                                | Undefined                                                                                             | 2  |   |
| RN FTE per 1000 patient days                   | Number of Full-time registered nurses per 1000 patient-days                                           | 5  | 6 |
|                                                | The number of registered nurse full-time equivalents (FTEs) per 1000 in-patient days.                 | 1  |   |
| RN per adjusted admission                      | Number of registered nurses/ adjusted admissions                                                      | 1  | 2 |
|                                                | Number of full-time equivalent registered nurses per 100 adjusted admissions                          | 1  |   |
| Others*                                        |                                                                                                       | 18 |   |

\*Others – Includes metrics that have frequencies of 1. This group includes - nursing hour per patient per shift, Inpatient clinical nursing worked hours per OCW), Mean difference between actual and expected nurse to patient ratio, RN hours per adjusted patient day, RN FTE, Total nursing hours, FTE RN to total hospital adjusted patient day, RN FTE per hospital, Daily average hours of care, All hours of direct care per patient day, RN per average daily census, The ratio of required to actual patient care hours, Required nursing personnel per shift, Number of licensed nurses, FTE RNs per adjusted average daily census, labour efficiency ratio, Daily average utilisation of RNs, Acuity-adjusted nursing hour per patient day
